# Supplementary material for: Relationship between Dose Prescription Methods and Local Control Rate in Stereotactic Body Radiotherapy for Early Stage Non-Small-Cell Lung Cancer: Systematic Review and Meta-Analysis
Source: MDPI journal article supplement (doi:10.3390/cancers14153815), 2022-08-05
Supplement: s1 [file s1]

**Relationship between prescription methods and local control rate in stereotactic body radiotherapy for early-stage non-small cell lung cancer: systematic review and meta-analysis**

**Takahisa Eriguchi et al.**

**Supplementals**

Table S1. Meta-analyses Of Observational Studies in Epidemiology checklist.

| Reporting Criteria                                                                                                                                                                                                                                                           | Reported (Yes/No) | Reported on Page No.                                       |
|------------------------------------------------------------------------------------------------------------------------------------------------------------------------------------------------------------------------------------------------------------------------------|-------------------|------------------------------------------------------------|
| <b>Reporting of Background</b>                                                                                                                                                                                                                                               |                   |                                                            |
| Problem definition                                                                                                                                                                                                                                                           | Yes               | Introduction, 1st paragraph                                |
| Hypothesis statement                                                                                                                                                                                                                                                         | Yes               | Introduction, 1st paragraph                                |
| Description of Study Outcome(s)                                                                                                                                                                                                                                              | Yes               | Introduction, 2nd paragraph                                |
| Type of exposure or intervention used                                                                                                                                                                                                                                        | Yes               | Introduction, 2nd paragraph                                |
| Type of study design used                                                                                                                                                                                                                                                    | Yes               | Introduction, 2nd paragraph                                |
| Study population                                                                                                                                                                                                                                                             | Yes               | Introduction, 2nd paragraph                                |
| <b>Reporting of Search Strategy</b>                                                                                                                                                                                                                                          |                   |                                                            |
| Qualifications of searchers (eg, librarians and investigators)                                                                                                                                                                                                               | Yes               | Materials and methods, Data extraction                     |
| Search strategy, including time period included in the synthesis and keywords                                                                                                                                                                                                | Yes               | Materials and methods, Study search                        |
| Effort to include all available studies, including contact with authors                                                                                                                                                                                                      | Yes               | Materials and methods, Study search                        |
| Databases and registries searched                                                                                                                                                                                                                                            | Yes               | Materials and methods, Study search & Supplemental Table 3 |
| Search software used, name and version, including special features used (eg, explosion)                                                                                                                                                                                      | Yes               | Materials and methods, Study search & Supplemental Table 3 |
| Use of hand searching (eg, reference lists of obtained articles)                                                                                                                                                                                                             | Yes               | Materials and methods, Study search                        |
| List of citations located and those excluded, including justification                                                                                                                                                                                                        | No                | Simply explained in PRISMA flow chart                      |
| Method for addressing articles published in languages other than English                                                                                                                                                                                                     | Yes               | Materials and methods, Study selection- design             |
| Method of handling abstracts and unpublished studies                                                                                                                                                                                                                         | Yes               | Materials and methods, Study selection- design             |
| Description of any contact with authors                                                                                                                                                                                                                                      | Yes               | Materials and methods, Study search                        |
| <b>Reporting of Methods</b>                                                                                                                                                                                                                                                  |                   |                                                            |
| Description of relevance or appropriateness of studies assembled for assessing the hypothesis to be tested                                                                                                                                                                   | Yes               | Materials and methods, Data extraction                     |
| Rationale for the selection and coding of data (eg, sound clinical principles or convenience)                                                                                                                                                                                | Yes               | Materials and methods, Data extraction                     |
| Documentation of how data were classified and coded (eg, multiple raters, blinding, and interrater reliability)                                                                                                                                                              | Yes               | Materials and methods, Data extraction                     |
| Assessment of confounding (eg, comparability of cases and controls in studies where appropriate)                                                                                                                                                                             | Yes               | Materials and methods, Data extraction                     |
| Assessment of study quality, including blinding of quality assessors; stratification or regression on possible predictors of study results                                                                                                                                   | Yes               | Materials and methods, Study quality assessment            |
| Assessment of heterogeneity                                                                                                                                                                                                                                                  | Yes               | Materials and methods, Study quality assessment            |
| Description of statistical methods (eg, complete description of fixed or random effects models, justification of whether the chosen models account for predictors of study results, dose-response models, or cumulative meta-analysis) in sufficient detail to be replicated | Yes               | Materials and methods, statistics                          |
| Provision of appropriate tables and graphics                                                                                                                                                                                                                                 | Yes               | Results                                                    |

|                                                                                                                           |     |                             |
|---------------------------------------------------------------------------------------------------------------------------|-----|-----------------------------|
| Reporting of Results                                                                                                      |     |                             |
| Table giving descriptive information for each study included                                                              | Yes | Table 1                     |
| Results of sensitivity testing (eg, subgroup analysis)                                                                    | Yes | Figure 3, Table2            |
| Indication of statistical uncertainty of findings                                                                         | Yes | Figure 3, Table2            |
| Reporting of Discussion                                                                                                   |     |                             |
| Consideration of alternative explanations for observed results                                                            | Yes | Discussion, 2-6th paragraph |
| Generalization of the conclusions (ie, appropriate for the data presented and within the domain of the literature review) | Yes | Conclusions                 |
| Guidelines for future research                                                                                            | Yes | Discussion, 7th paragraph   |
| Disclosure of funding source                                                                                              | Yes | Footnote                    |

Table S2. Inclusion and exclusion criteria.

|                                   |
|-----------------------------------|
| Inclusion criteria                |
| SBRT for peripheral NSCLC         |
| LC and dose prescription provided |
| Exclusion criteria                |
| Central lesion*                   |
| Metastatic lung tumor             |
| Small cell lung cancer            |
| Studies limited to                |
| Stage III, IV                     |
| T3, T4*                           |
| postoperative recurrence          |
| specific pathology                |
| ground glass opacity              |
| Concurrent chemotherapy           |
| Charged particle radiotherapy     |
| Fraction number > 10              |
| Median f/u < 24 months            |
| Patient number < 25               |
| Review or case report             |
| Non-English study                 |

Abbreviations: SBRT = stereotactic body radiotherapy; NSCLC = non-small cell lung cancer; LC = local control; f/u = follow-up. \* Including less than 10% of central lesion or T3, T4 tumors are permitted.

Table S3. Search formulas.

| Database and search formula                                                                                                                                                                                                                                                                                                                              | N    |
|----------------------------------------------------------------------------------------------------------------------------------------------------------------------------------------------------------------------------------------------------------------------------------------------------------------------------------------------------------|------|
| PubMed                                                                                                                                                                                                                                                                                                                                                   | 1350 |
| #1 (NSCLC OR non-small cell lung cancer OR ((lung OR pulmonary) AND (cancer OR carcinoma OR malignancy OR tumor OR neoplasm OR neoplasms OR carcinomas OR malignancies)))<br>#2 (SBRT[title] OR SRT[title] OR SABR[title] OR stereotactic[title])<br>#3 (local control OR local recurrence OR local relapse OR local progression)<br>#4 #1 and #2 and #3 |      |

Table S4. Newcastle-Ottawa Scale score.

| 1st author     | Total | Representative<br>(0 or 1) | Selection on non-exposed<br>(0 or 1) | Ascertainment<br>(0 or 1) | Demonstration<br>(0 or 1) | Comparability<br>(0 or 2) | Assessment<br>(0 or 1) | Long enough<br>(0 or 1) | Adequate followup<br>(0 or 1) |
|----------------|-------|----------------------------|--------------------------------------|---------------------------|---------------------------|---------------------------|------------------------|-------------------------|-------------------------------|
| Nagata         | 5     | 1                          | 0                                    | 1                         | 0                         | 0                         | 1                      | 1                       | 1                             |
| Salazar        | 5     | 1                          | 0                                    | 1                         | 0                         | 0                         | 1                      | 1                       | 1                             |
| Takeda         | 5     | 1                          | 0                                    | 1                         | 0                         | 0                         | 1                      | 1                       | 1                             |
| Fakiris        | 5     | 1                          | 0                                    | 1                         | 0                         | 0                         | 1                      | 1                       | 1                             |
| Fakiris        | 5     | 1                          | 0                                    | 1                         | 0                         | 0                         | 1                      | 1                       | 1                             |
| Ricardi        | 5     | 1                          | 0                                    | 1                         | 0                         | 0                         | 1                      | 1                       | 1                             |
| Brown          | 5     | 1                          | 0                                    | 1                         | 0                         | 0                         | 1                      | 1                       | 1                             |
| Grills         | 5     | 1                          | 0                                    | 1                         | 0                         | 0                         | 1                      | 1                       | 1                             |
| Timmerman      | 6     | 1                          | 0                                    | 1                         | 1                         | 0                         | 1                      | 1                       | 1                             |
| Shirata        | 5     | 1                          | 0                                    | 1                         | 0                         | 0                         | 1                      | 1                       | 1                             |
| Shirata        | 5     | 1                          | 0                                    | 1                         | 0                         | 0                         | 1                      | 1                       | 1                             |
| Inoue          | 5     | 1                          | 0                                    | 1                         | 0                         | 0                         | 1                      | 1                       | 1                             |
| Suzuki         | 5     | 1                          | 0                                    | 1                         | 0                         | 0                         | 1                      | 1                       | 1                             |
| Hamaji         | 5     | 1                          | 0                                    | 1                         | 0                         | 0                         | 1                      | 1                       | 1                             |
| Lindberg       | 5     | 1                          | 0                                    | 1                         | 0                         | 0                         | 1                      | 1                       | 1                             |
| Shibamoto      | 5     | 1                          | 0                                    | 1                         | 0                         | 0                         | 1                      | 1                       | 1                             |
| Hayashi        | 5     | 1                          | 0                                    | 1                         | 0                         | 0                         | 1                      | 1                       | 1                             |
| Nagata         | 6     | 1                          | 0                                    | 1                         | 1                         | 0                         | 1                      | 1                       | 1                             |
| Shaverdian     | 5     | 1                          | 0                                    | 1                         | 0                         | 0                         | 1                      | 1                       | 1                             |
| Tsurugai       | 5     | 1                          | 0                                    | 1                         | 0                         | 0                         | 1                      | 1                       | 1                             |
| Navarro-Martin | 5     | 1                          | 0                                    | 1                         | 0                         | 0                         | 1                      | 1                       | 1                             |
| Mancini        | 5     | 1                          | 0                                    | 1                         | 0                         | 0                         | 1                      | 1                       | 1                             |
| Aoki           | 5     | 1                          | 0                                    | 1                         | 0                         | 0                         | 1                      | 1                       | 1                             |
| Sun            | 6     | 1                          | 0                                    | 1                         | 1                         | 0                         | 1                      | 1                       | 1                             |
| Miyakawa       | 6     | 1                          | 0                                    | 1                         | 1                         | 0                         | 1                      | 1                       | 1                             |
| Lee            | 5     | 1                          | 0                                    | 1                         | 0                         | 0                         | 1                      | 1                       | 1                             |
| Raghavan       | 5     | 1                          | 0                                    | 1                         | 0                         | 0                         | 1                      | 1                       | 1                             |
| Cummings       | 5     | 1                          | 0                                    | 1                         | 0                         | 0                         | 1                      | 1                       | 1                             |
| Cummings       | 5     | 1                          | 0                                    | 1                         | 0                         | 0                         | 1                      | 1                       | 1                             |
| Karasawa       | 5     | 1                          | 0                                    | 1                         | 0                         | 0                         | 1                      | 1                       | 1                             |

|          |   |   |   |   |   |   |   |   |   |
|----------|---|---|---|---|---|---|---|---|---|
| Menoux   | 5 | 1 | 0 | 1 | 0 | 0 | 1 | 1 | 1 |
| Wegner   | 5 | 1 | 0 | 1 | 0 | 0 | 1 | 1 | 1 |
| Tsurugai | 5 | 1 | 0 | 1 | 0 | 0 | 1 | 1 | 1 |
| Tsurugai | 5 | 1 | 0 | 1 | 0 | 0 | 1 | 1 | 1 |
| Ball     | 6 | 1 | 0 | 1 | 1 | 0 | 1 | 1 | 1 |
| Weiss    | 5 | 1 | 0 | 1 | 0 | 0 | 1 | 1 | 1 |
| Shu      | 5 | 1 | 0 | 1 | 0 | 0 | 1 | 1 | 1 |
| Duvergé  | 5 | 1 | 0 | 1 | 0 | 0 | 1 | 1 | 1 |

---

a

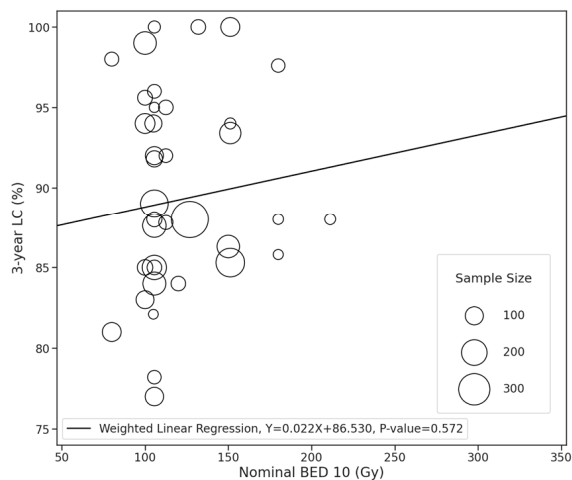

b

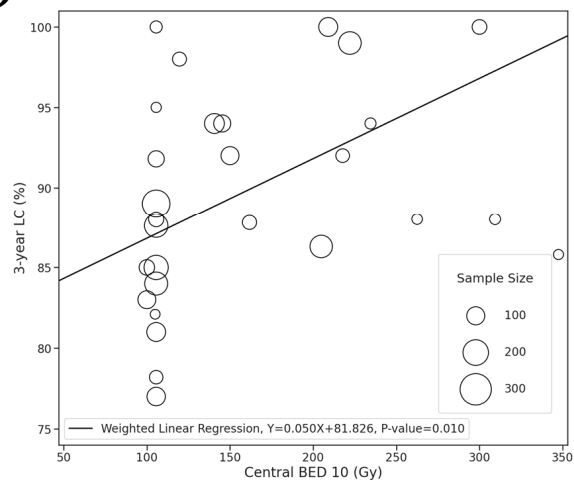

c

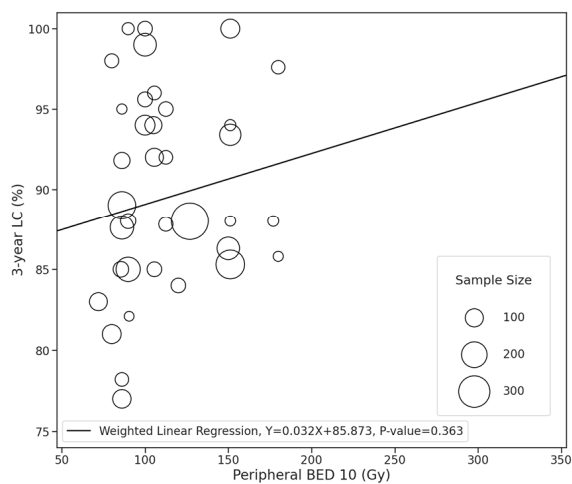

d

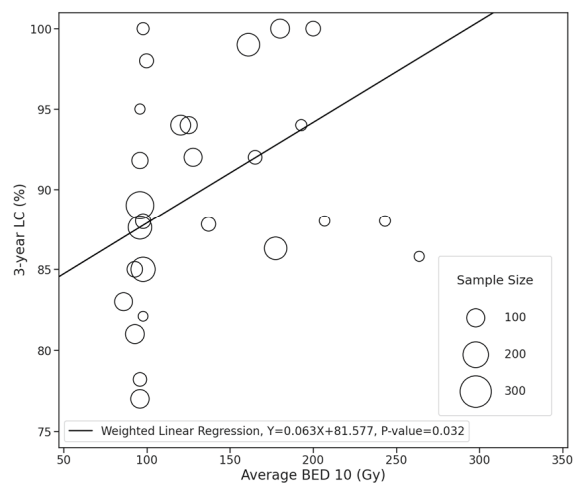

Figure S1. The 3-year local control rate according to (a) nominal BED, (b) central BED, (c) peripheral BED, and (d) average BED with weighted Spearman correlation.
